# Supplementary material for: Comprehensive PBPK model to predict drug interaction potential of Zanubrutinib as a victim or perpetrator
Source: PubMed Central journal article supplement — CPT Pharmacometrics Syst Pharmacol. 2021 May 2;10(5):441–54. doi: 10.1002/psp4.12605 (PMC8129716; doi:10.1002/psp4.12605), 2021-05-02
Supplement: PSP4-10-441-s001.pdf [file PSP4-10-441-s001.pdf]

**Figure S3. Observed and simulated plasma concentration-time profiles of midazolam with and without rifampicin**

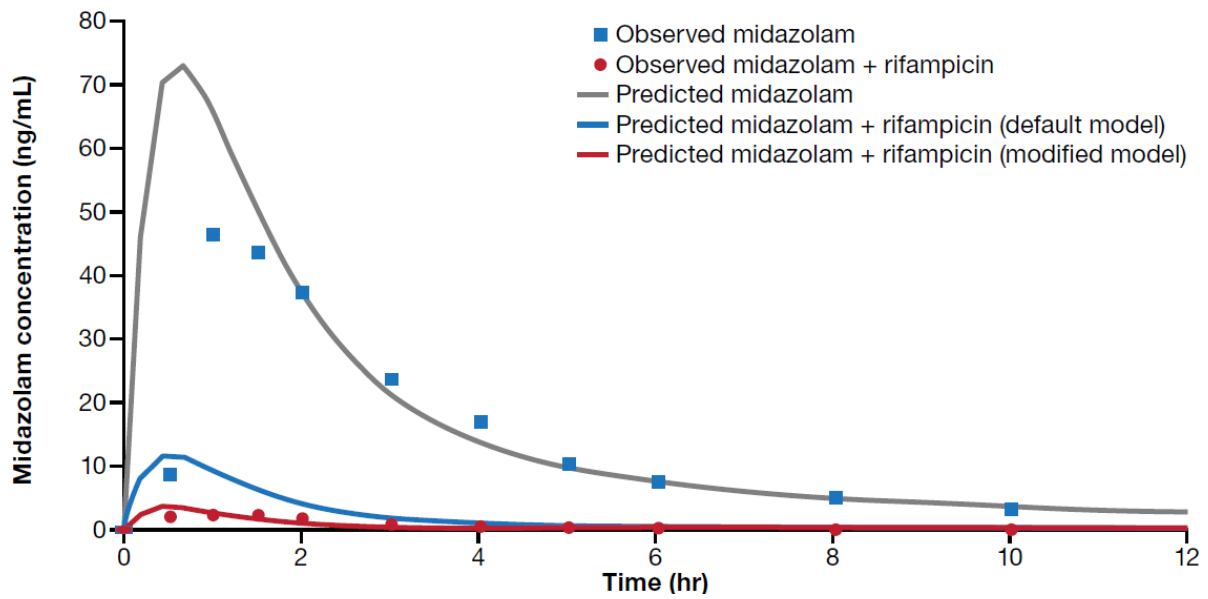

Plasma concentrations of midazolam after a 15-mg oral dose following pretreatment with rifampicin 600 mg once daily for 5 days. The observed data were based on the work of Backman et al.<sup>4</sup> Simulations based on the rifampicin default compound file in Simcyp library (Simcyp version 16) or modified rifampicin model (with parameters changes in  $Ind_{max}$  and  $Ind_{C50}$  according to the work of Yamashita et al<sup>5</sup> and Fahmi et al<sup>6</sup>) are shown. Abbreviations:  $Ind_{50}$ , half maximum-fold induction concentration;  $Ind_{max}$ , maximum-fold induction.
