# Supplementary material for: Comprehensive PBPK model to predict drug interaction potential of Zanubrutinib as a victim or perpetrator
Source: PubMed Central journal article supplement — CPT Pharmacometrics Syst Pharmacol. 2021 May 2;10(5):441–54. doi: 10.1002/psp4.12605 (PMC8129716; doi:10.1002/psp4.12605), 2021-05-02
Supplement: PSP4-10-441-s003.pdf [file PSP4-10-441-s003.pdf]

**Figure S4. Observed and simulated zanubrutinib geometric mean  $C_{max}$  and AUC ratios (95% CI) with various CYP3A4 inhibitors and inducers**

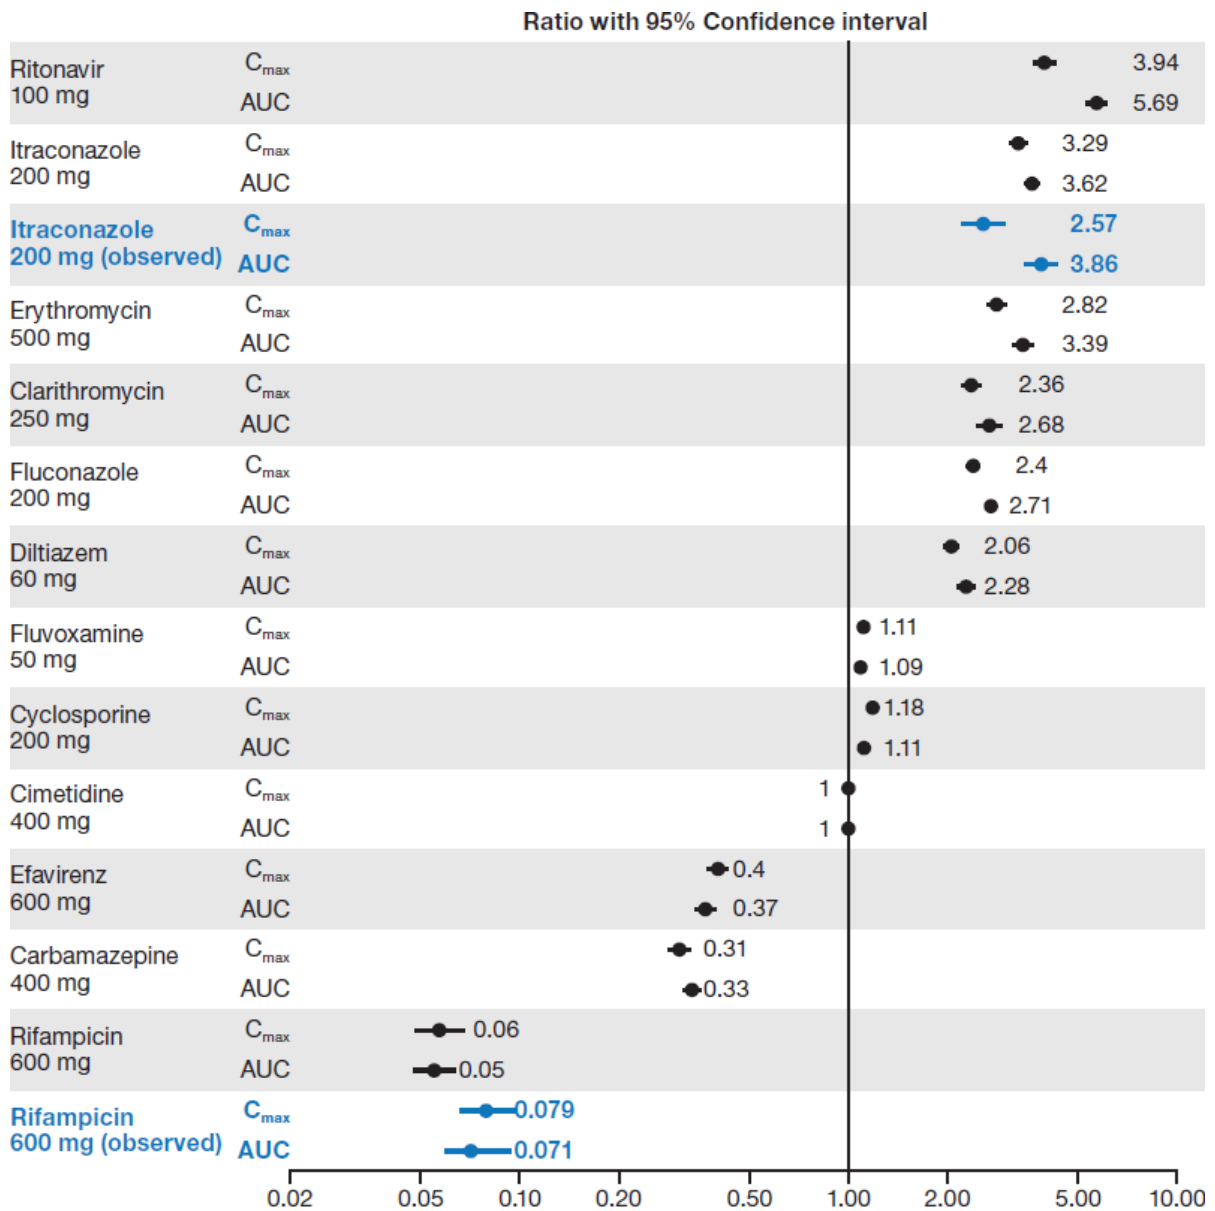

Simulation conditions: 10 virtual trials, each trial included 10 subjects (aged 20-50 years and 50% female). Each subject received an inhibitor or inducer for 10 days; Single dose of zanubrutinib 160 mg was administered at Day 10.

Abbreviations: AUC, area under the plasma concentration–time curve; CI, confidence interval;  $C_{max}$ , maximum plasma concentration.
