# Supplementary material for: Comprehensive PBPK model to predict drug interaction potential of Zanubrutinib as a victim or perpetrator
Source: PubMed Central journal article supplement — CPT Pharmacometrics Syst Pharmacol. 2021 May 2;10(5):441–54. doi: 10.1002/psp4.12605 (PMC8129716; doi:10.1002/psp4.12605), 2021-05-02
Supplement: PSP4-10-441-s004.pdf [file PSP4-10-441-s004.pdf]

**Figure S1. Simulated vs observed plasma concentration-time profiles of itraconazole and hydroxy-itraconazole following multiple doses of itraconazole in capsule formulation under a fasted state**

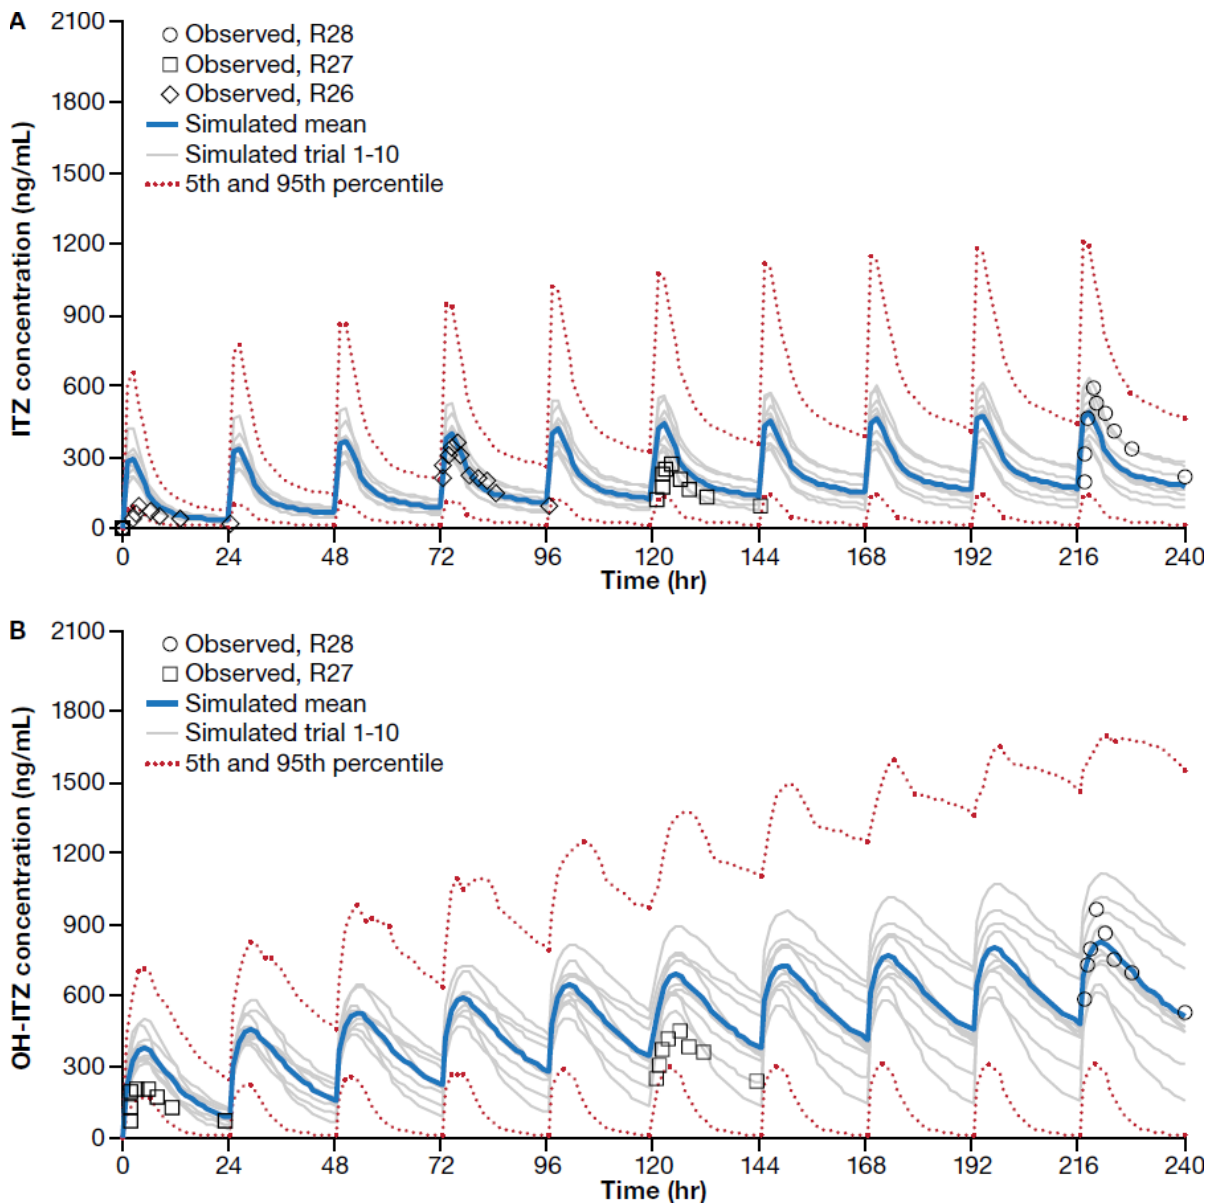

The dotted points are observed data following itraconazole doses of 200 mg daily for 4 days (denoted as R26),<sup>1</sup> for 6 days (denoted as R27),<sup>2</sup> and for 10 days (denoted as R28).<sup>3</sup> Hydroxy-itraconazole data from the study<sup>1</sup> are not available. The simulated mean is the mean of 100 individuals (10 trials of 10 subjects per trial); simulated trial is the mean of 10 subjects in each trial; the 5th and 95th percentile for 100 individuals simulated represents the 5th and 95th highest concentrations from the ranked concentrations.

Abbreviations: ITZ, itraconazole; OH-ITZ, hydroxy-itraconazole.
