# Supplementary material for: Comprehensive PBPK model to predict drug interaction potential of Zanubrutinib as a victim or perpetrator
Source: PubMed Central journal article supplement — CPT Pharmacometrics Syst Pharmacol. 2021 May 2;10(5):441–54. doi: 10.1002/psp4.12605 (PMC8129716; doi:10.1002/psp4.12605), 2021-05-02
Supplement: PSP4-10-441-s007.pdf [file PSP4-10-441-s007.pdf]

## References for Supplemental Figures

1. Bae SK, *et al.* Increased Oral Bioavailability of Itraconazole and Its Active Metabolite, 7-Hydroxyitraconazole, When Coadministered With a Vitamin C Beverage in Healthy Participants. *The Journal of Clinical Pharmacology* **51** 444-451. (2011)
2. Barone JA, *et al.* Food interaction and steady-state pharmacokinetics of itraconazole capsules in healthy male volunteers. *Antimicrobial Agents and Chemotherapy* **37** 778. (1993)
3. Lange D, Pavao JH, Wu J, Klausner M. Effect of a Cola Beverage on the Bioavailability of Itraconazole in the Presence of H<sub>2</sub> Blockers. *The Journal of Clinical Pharmacology* **37** 535-540. (1997)
4. Backman JT, Olkkola KT, Neuvonen PJ. Rifampin drastically reduces plasma concentrations and effects of oral midazolam. *Clinical Pharmacology & Therapeutics* **59** 7-13. (1996)
5. Yamashita F, *et al.* Modeling of Rifampicin-Induced CYP3A4 Activation Dynamics for the Prediction of Clinical Drug-Drug Interactions from In Vitro Data. *PLOS ONE* **8** e70330. (2013)
6. Fahmi OA, *et al.* Evaluation of CYP2B6 Induction and Prediction of Clinical Drug-Drug Interactions: Considerations from the IQ Consortium Induction Working Group—An Industry Perspective. *Drug Metabolism and Disposition* **44** 1720. (2016)
